# Supplementary material
Source: Springer Nature journal article supplement (https://www.springermedizin.de/resource/supplementary/12943_2011_933_MOESM2_ESM.pdf/9551706)

**A.****Relative Luciferase  
Activity**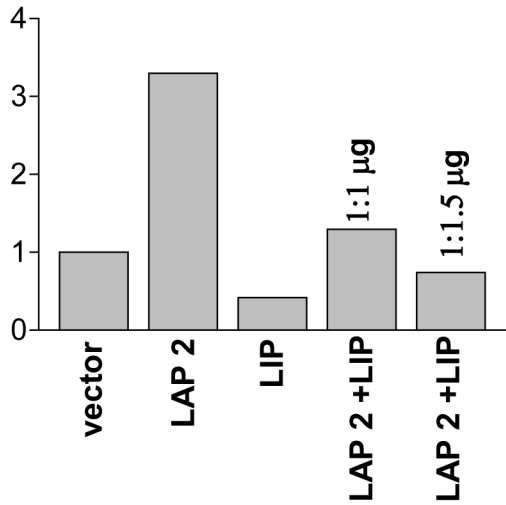**B.****Relative Luciferase  
Activity**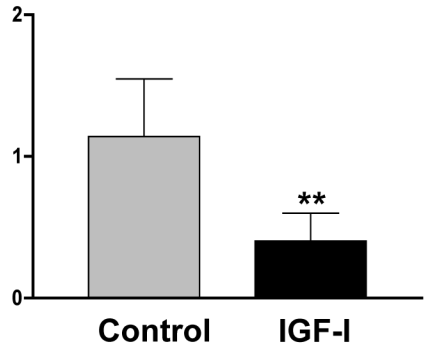

Supplement: MOESM2 [file 9551706]
